# Supplementary material for: Anti-breast cancer sinomenine derivatives via mechanisms of apoptosis induction and metastasis reduction
Source: PubMed Central journal article supplement (PMC9272937; doi:10.1080/14756366.2022.2096020), 2022-07-08
Supplement: IENZ_A_2096020_SM6828.pdf [file IENZ_A_2096020_SM6828.pdf]

## **Anti-breast cancer sinomenine derivatives via mechanisms of apoptosis induction and metastasis reduction**

Xiang Gao<sup>a</sup>, Baojia Sun<sup>b</sup>, Yonglian Hou<sup>a</sup>, Lilin Liu<sup>a</sup>, Jianan Sun<sup>a</sup>, Fanxing Xu<sup>c</sup>, Dahong Li<sup>a,\*</sup>, Huiming Hua<sup>a,\*</sup>

*<sup>a</sup>Key Laboratory of Structure-Based Drug Design & Discovery, Ministry of Education, and School of Traditional Chinese Materia Medica, Shenyang Pharmaceutical University, 103 Wenhua Road, Shenyang 110016, P. R. China*

*<sup>b</sup>Yantai Valiant Pharmaceutical Co. Ltd., 60 Taiyuan Road, Dajijia Industrial Park, YEDA Yantai, Shandong 264006, PR China*

*<sup>c</sup>Wuya College of Innovation, Shenyang Pharmaceutical University, 103 Wenhua Road, Shenyang 110016, PR China*

\*Corresponding author. E-mail address: lidahong0203@163.com (D. Li); huimhua@163.com (H. Hua)

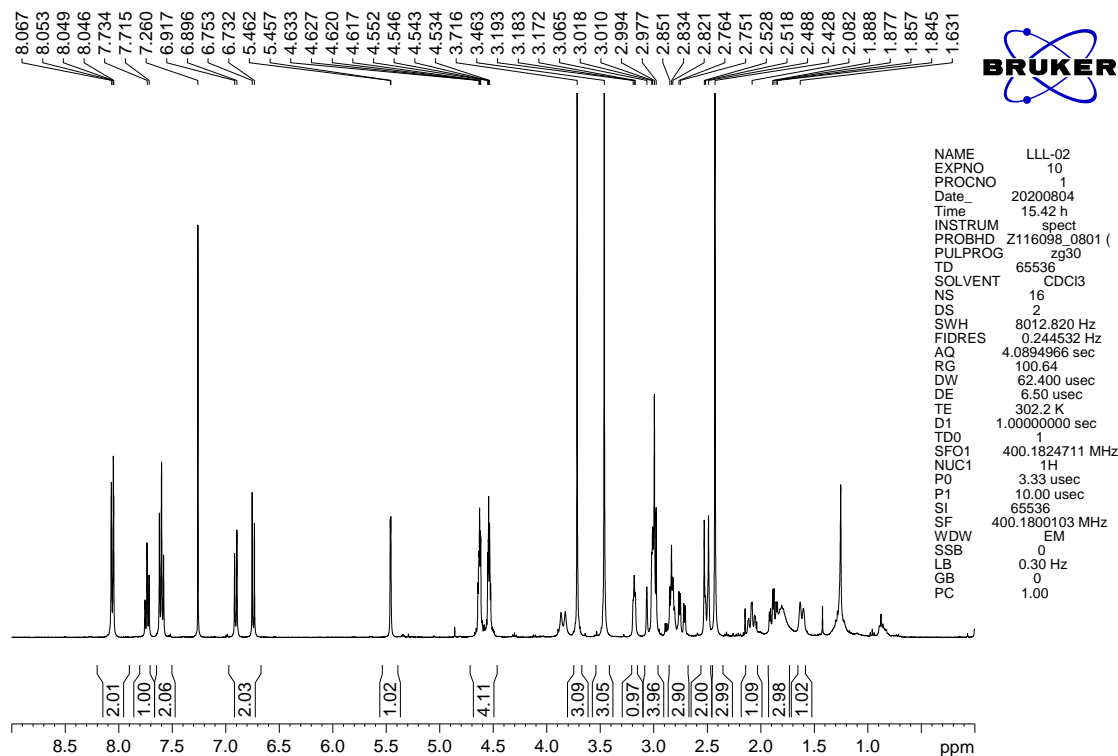

Figure S1.  $^1\text{H}$  NMR of compound **7Aa**

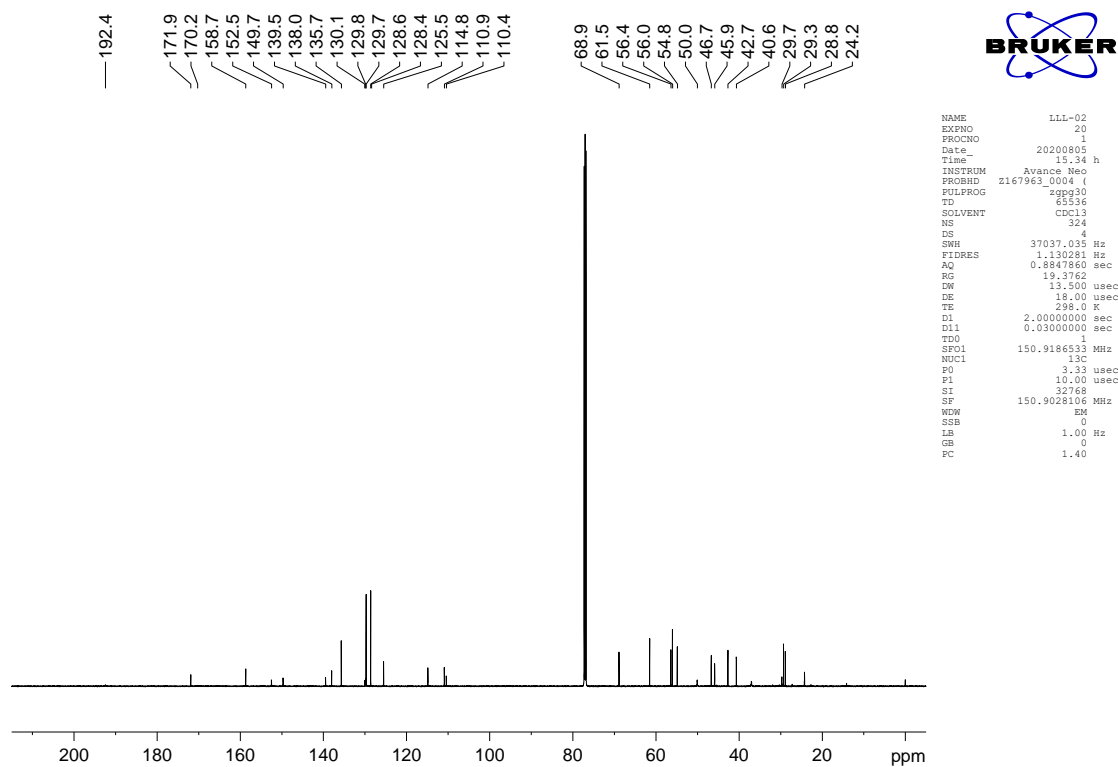

Figure S2.  $^{13}\text{C}$  NMR of compound **7Aa**

+MS, 0.7min #86

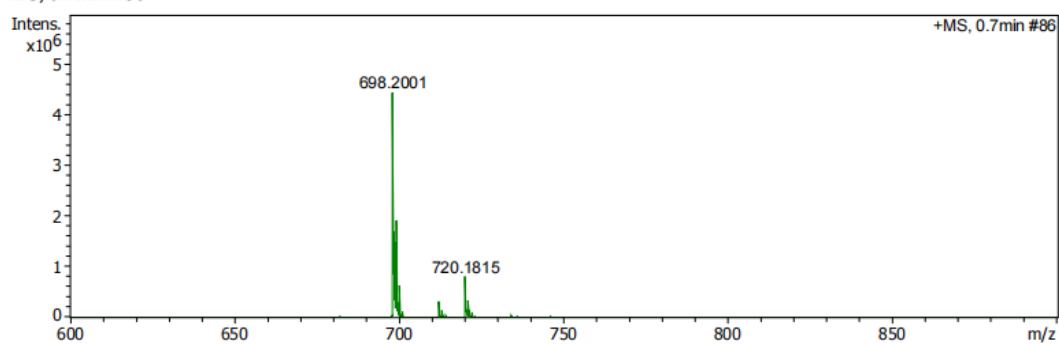

Figure S3. HRESIMS of compound 7Aa

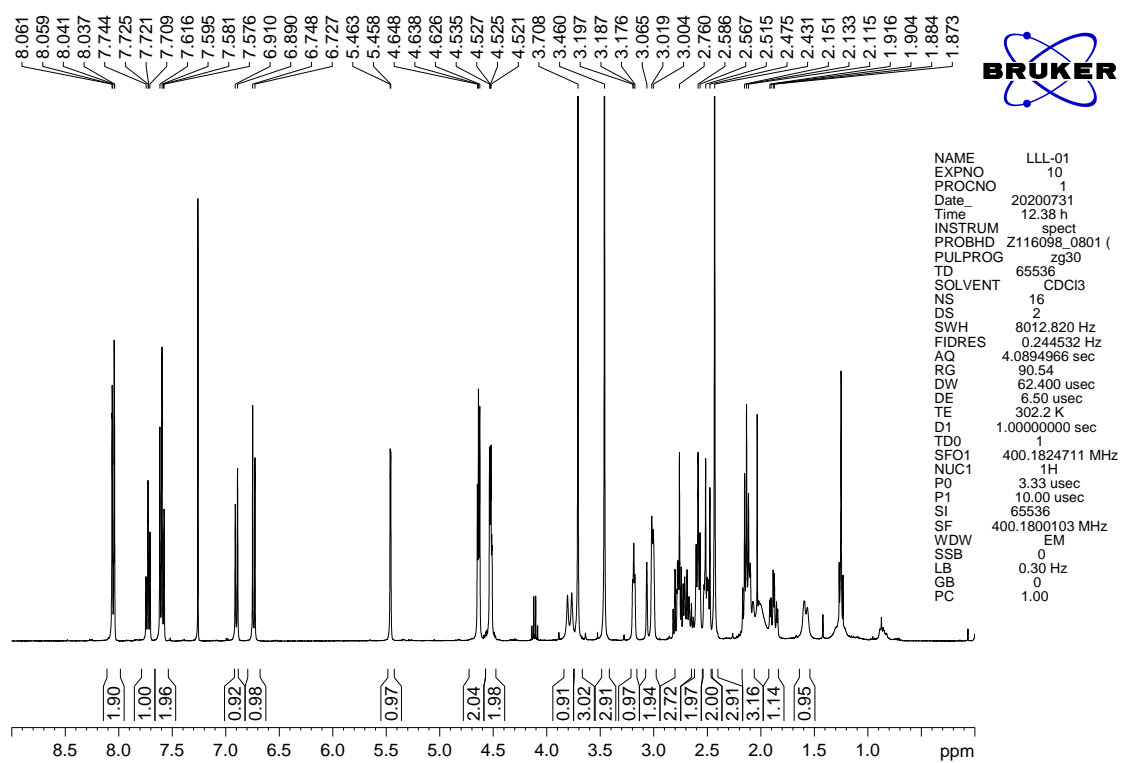

Figure S4. <sup>1</sup>H NMR of compound 7Ab

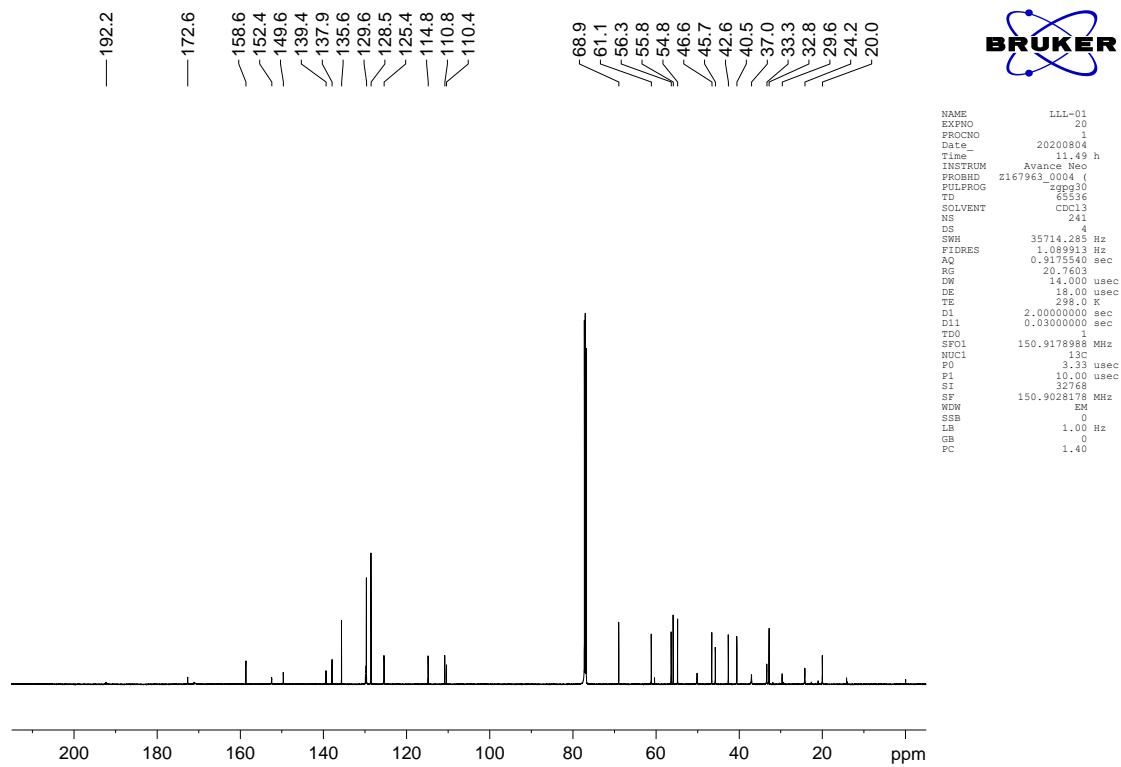

Figure S5. <sup>13</sup>C NMR of compound **7Ab**

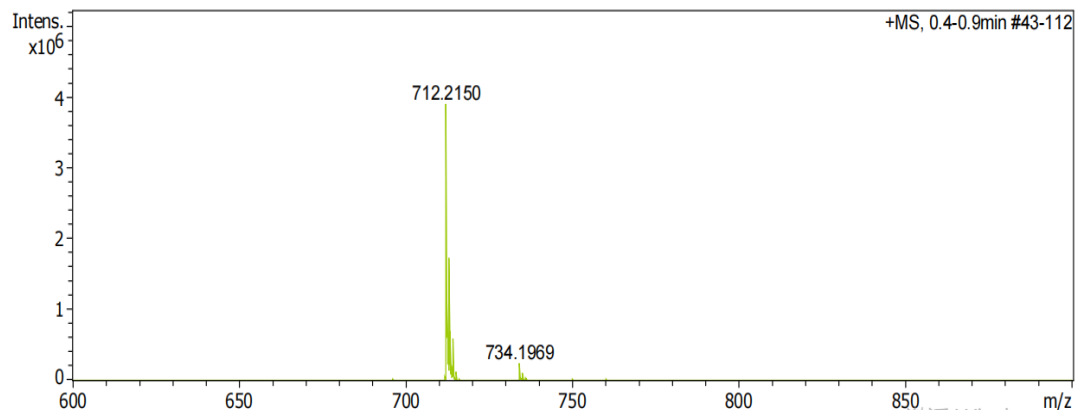

Figure S6. HRESIMS of compound **7Ab**

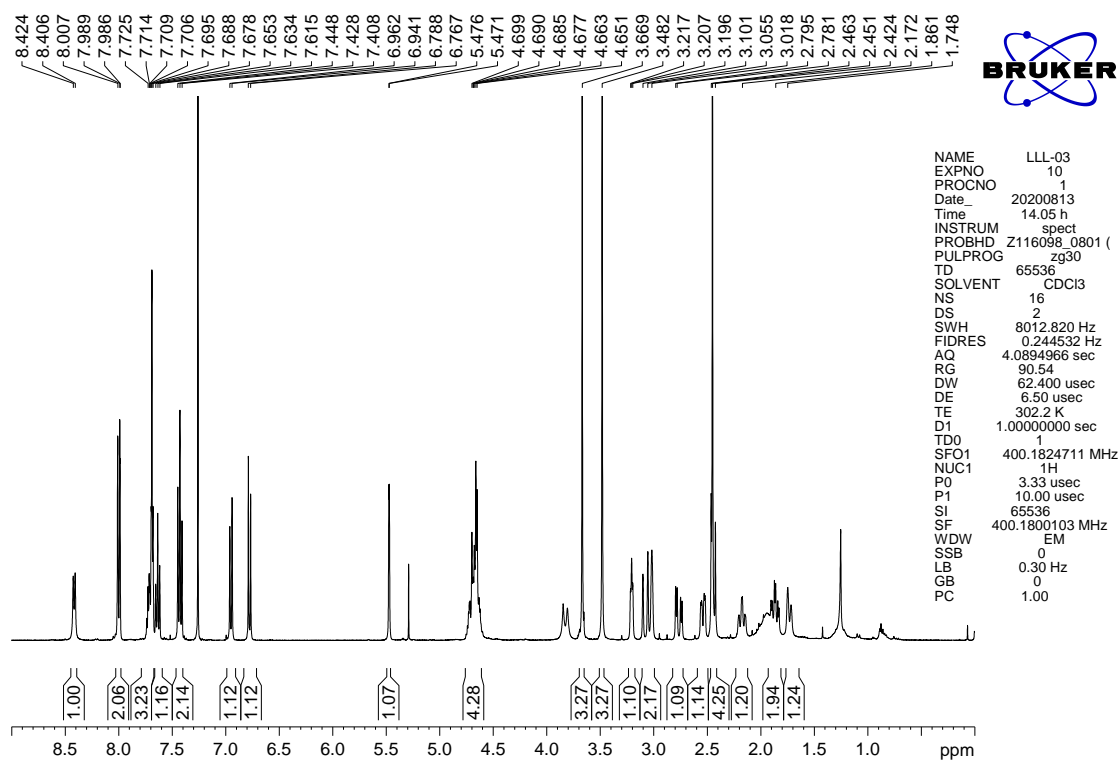

Figure S7.  $^1\text{H}$  NMR of compound **7Ac**

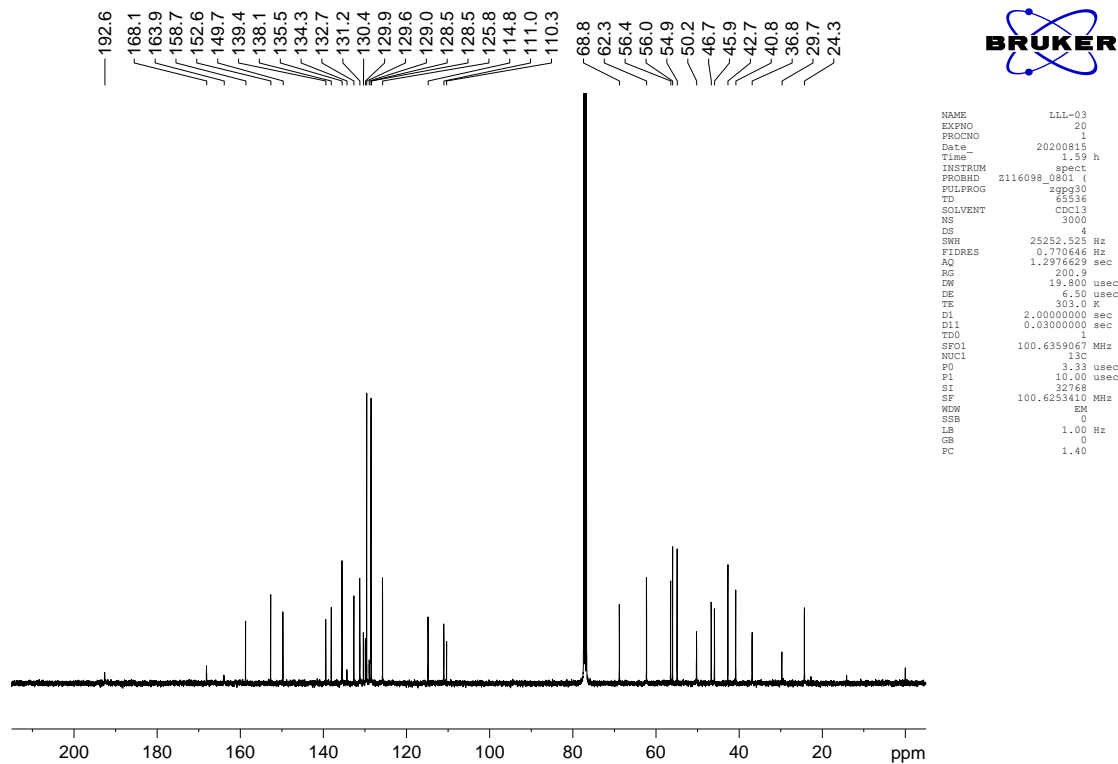

Figure S8.  $^{13}\text{C}$  NMR of compound **7Ac**

+MS, 0.8min #91

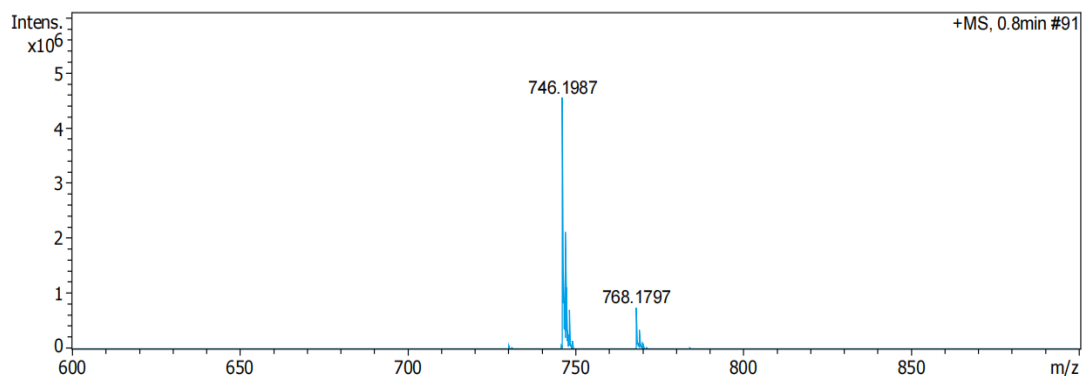

Figure S9. HRESIMS of compound 7Ac

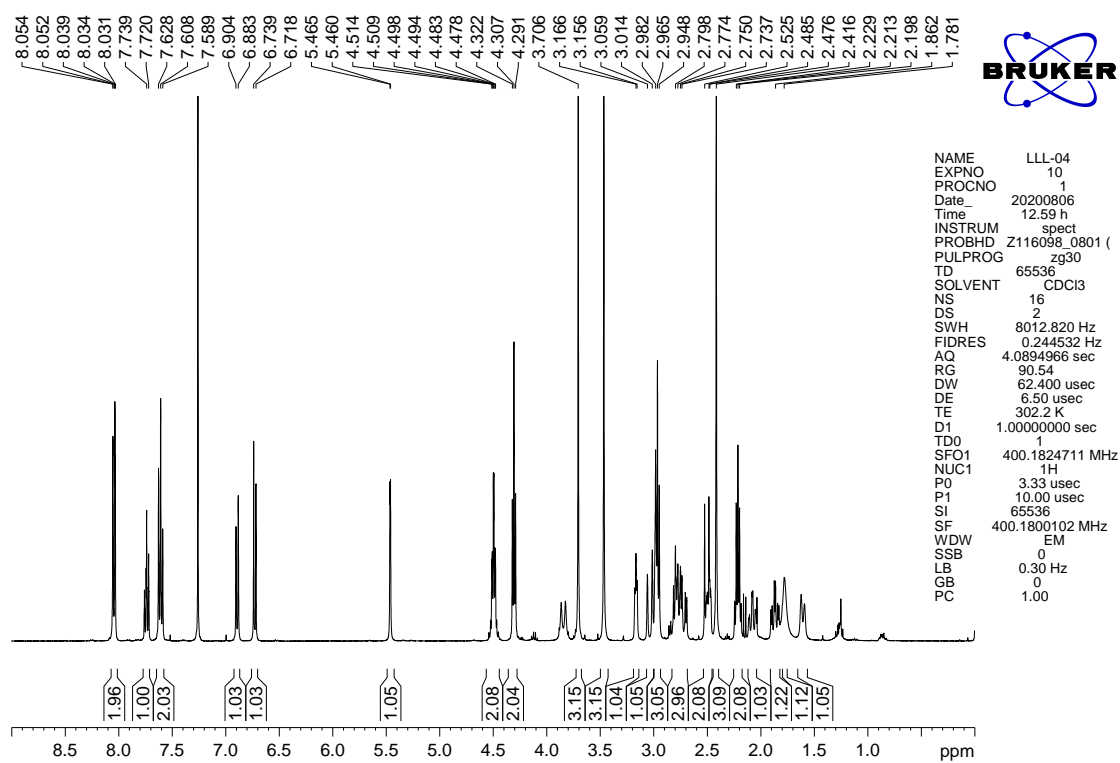

Figure S10. <sup>1</sup>H NMR of compound 7Ba

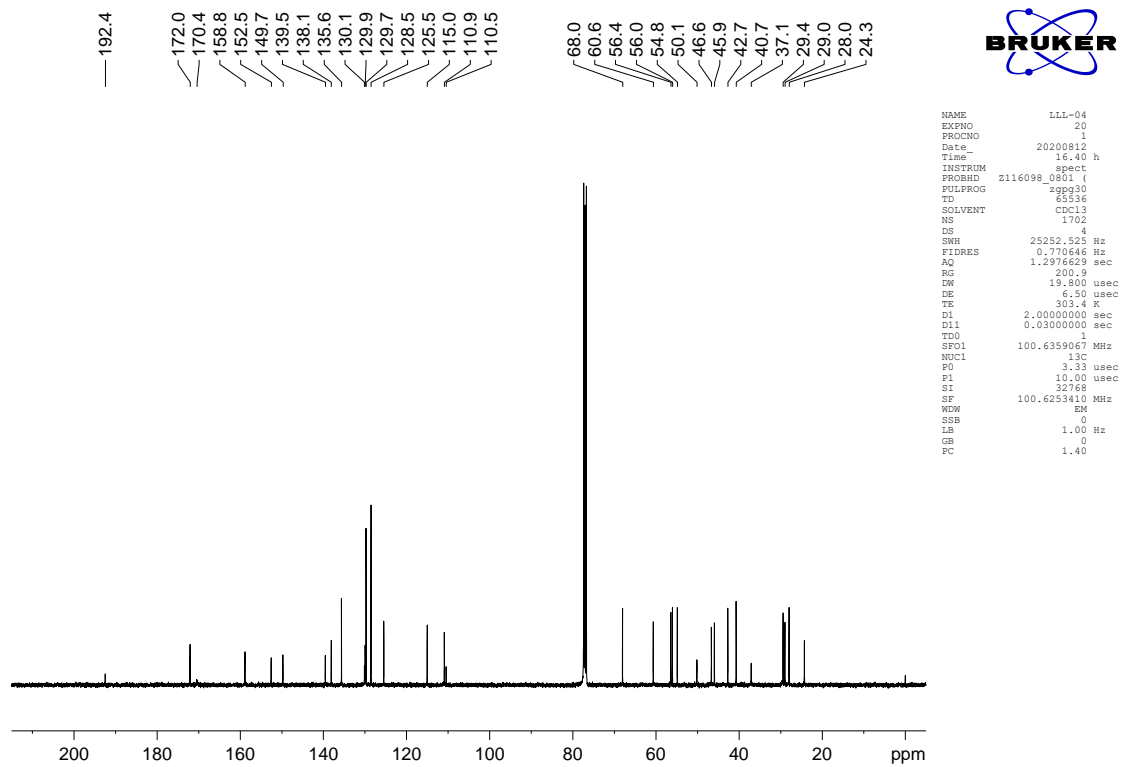

Figure S11.  $^{13}\text{C}$  NMR of compound **7Ba**

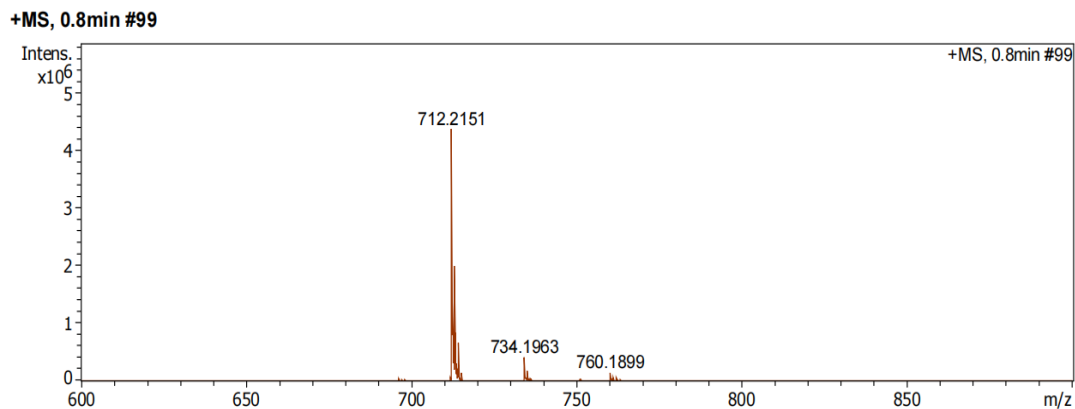

Figure S12. HRESIMS of compound **7Ba**

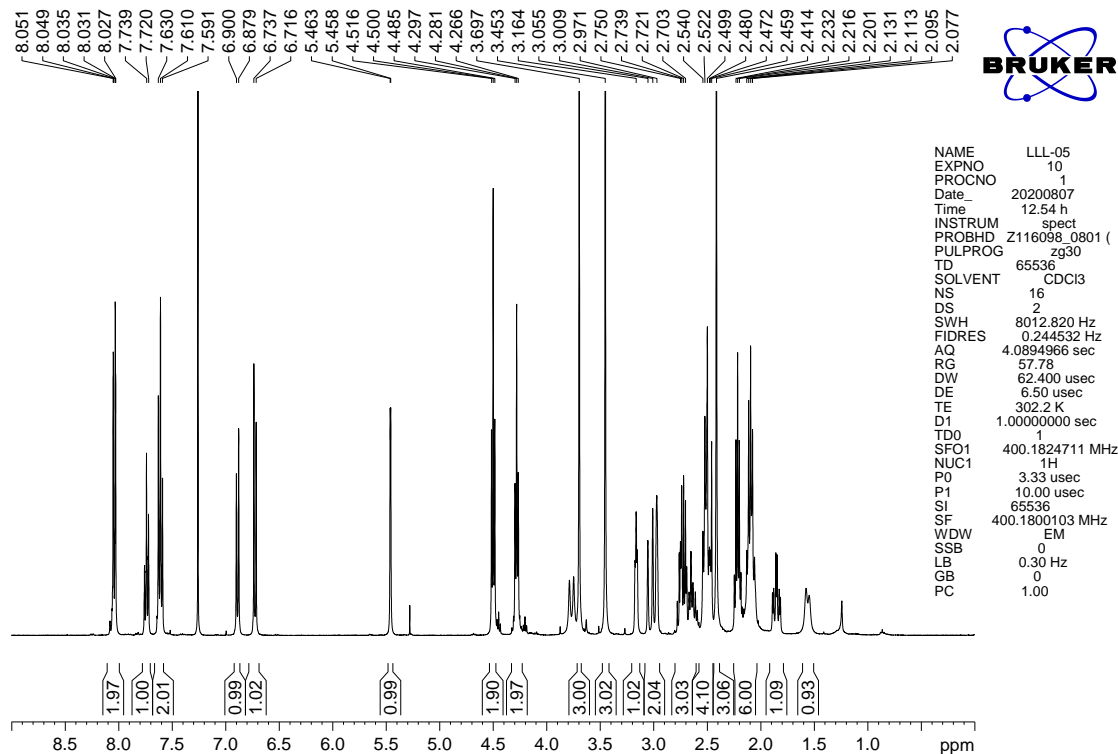

Figure S13. <sup>1</sup>H NMR of compound 7Bb

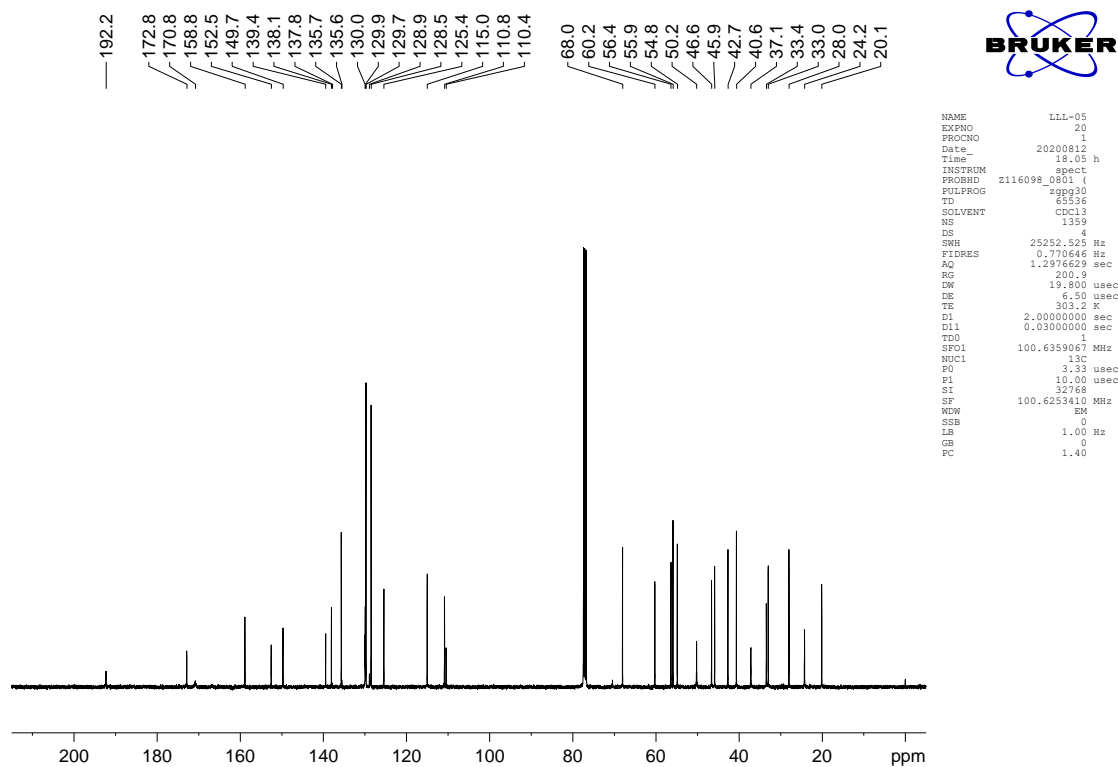

Figure S14. <sup>13</sup>C NMR of compound 7Bb



+MS, 0.8min #98

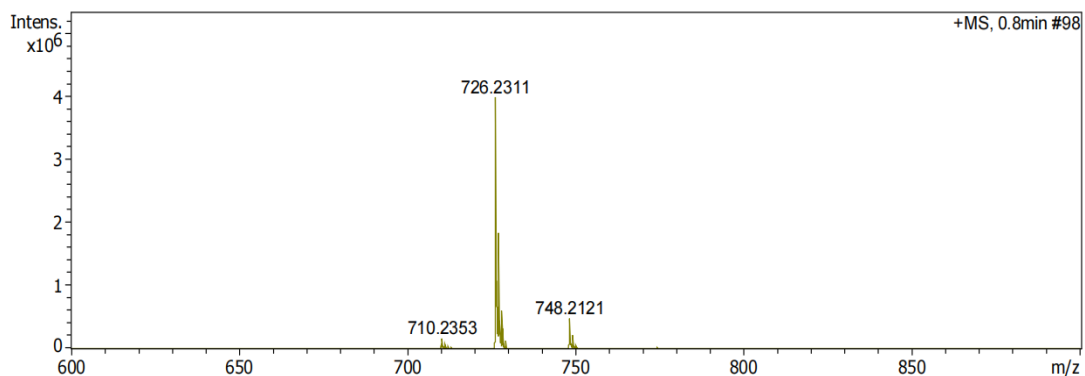

Figure S15. HRESIMS of compound **7Bb**

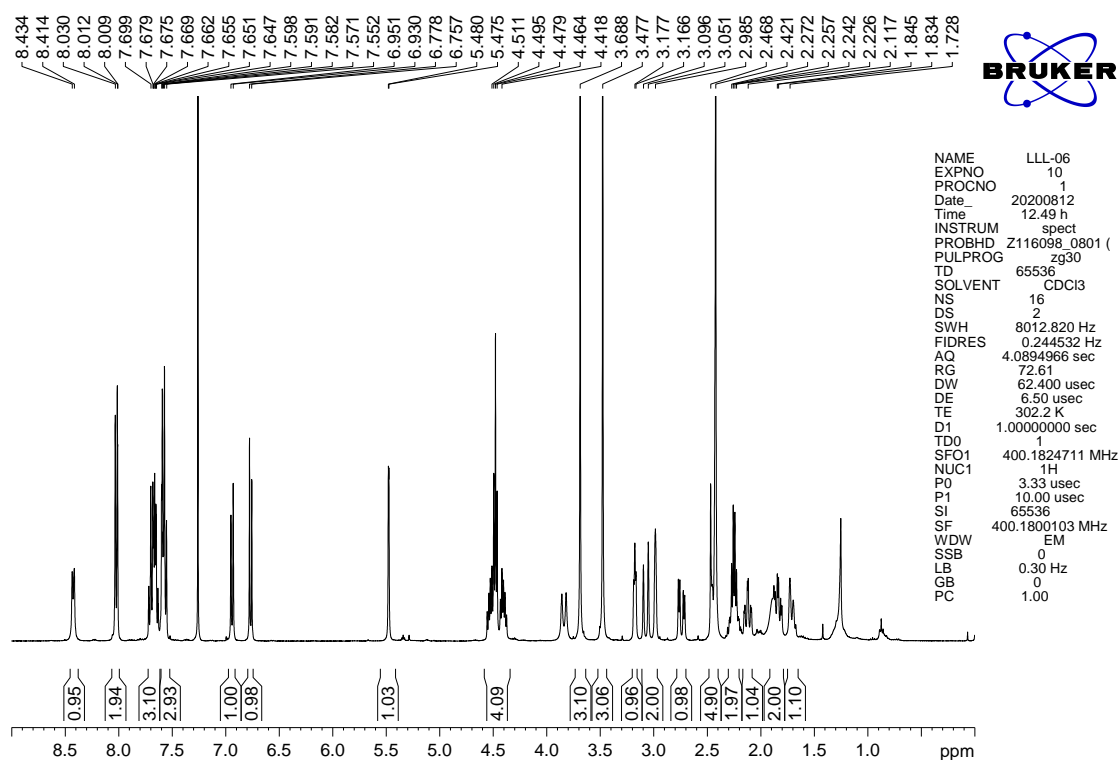

Figure S16. <sup>1</sup>H NMR of compound **7Bc**

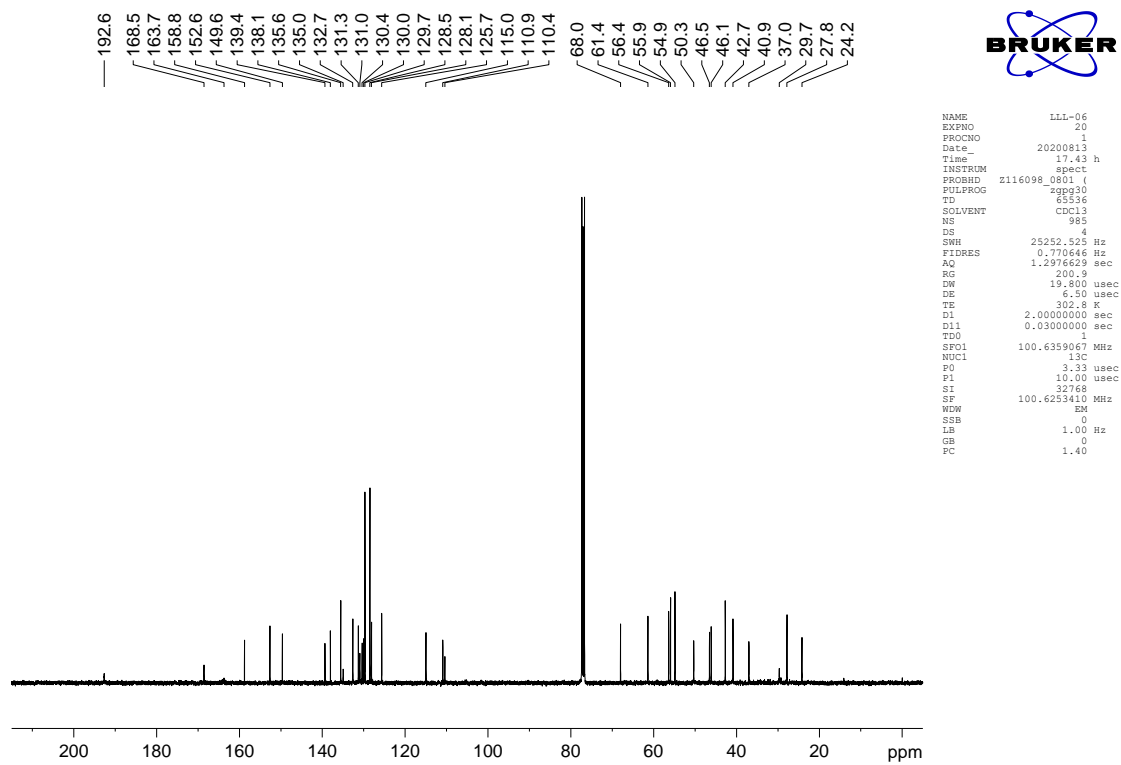

Figure S17. <sup>13</sup>C NMR of compound **7Bc**

+MS, 0.9min #103

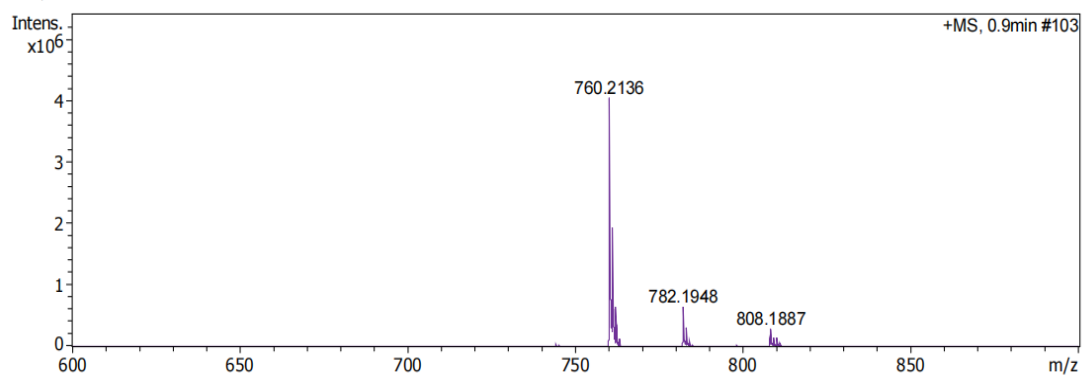

Figure S18. HRESIMS of compound **7Bc**

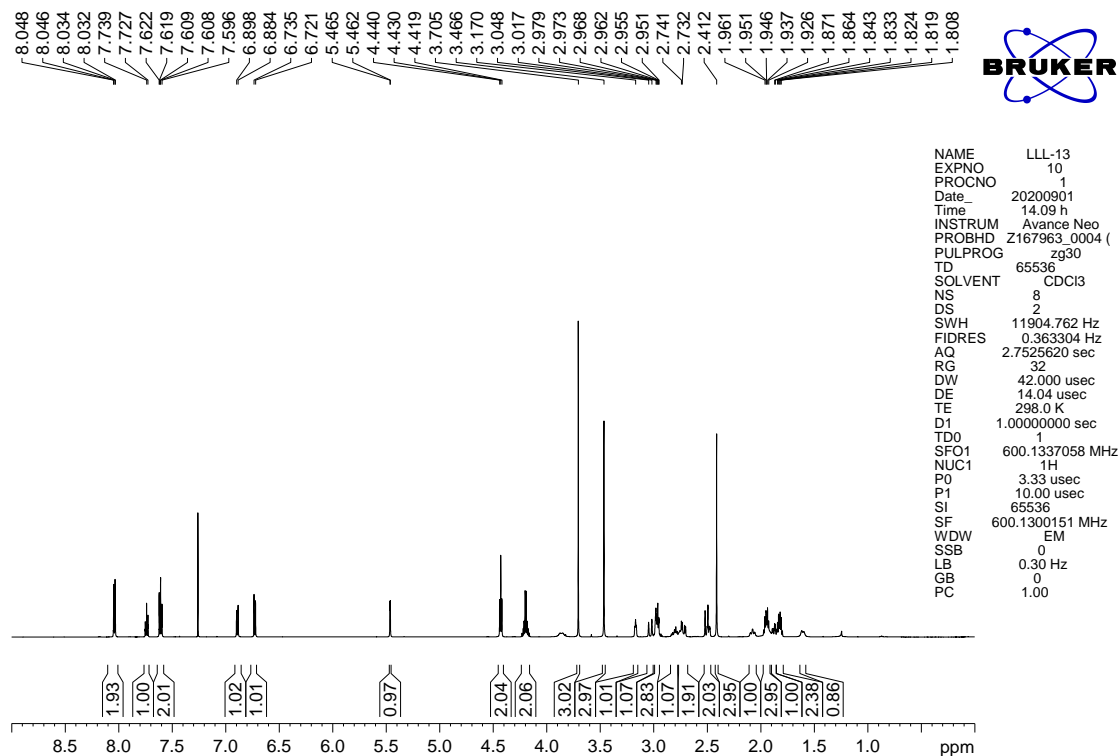

Figure S19. <sup>1</sup>H NMR of compound 7Ca

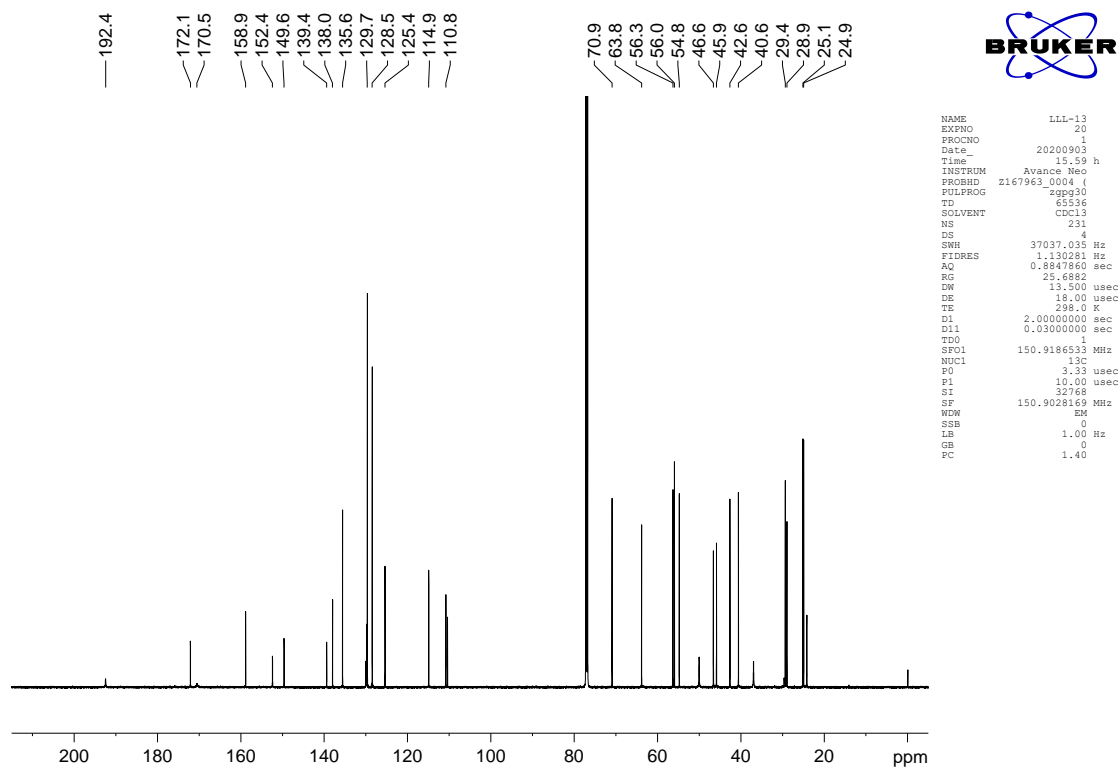

Figure S20. <sup>13</sup>C NMR of compound 7Ca

+MS, 0.9min #104

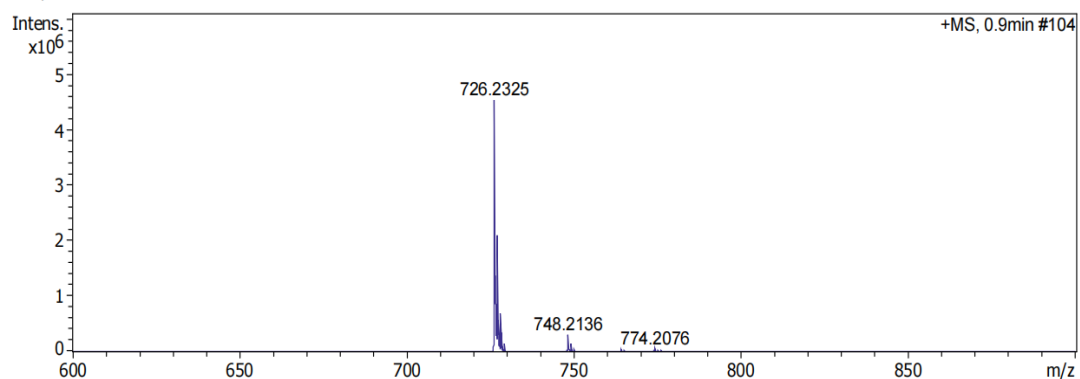

Figure S21. HRESIMS of compound 7Ca

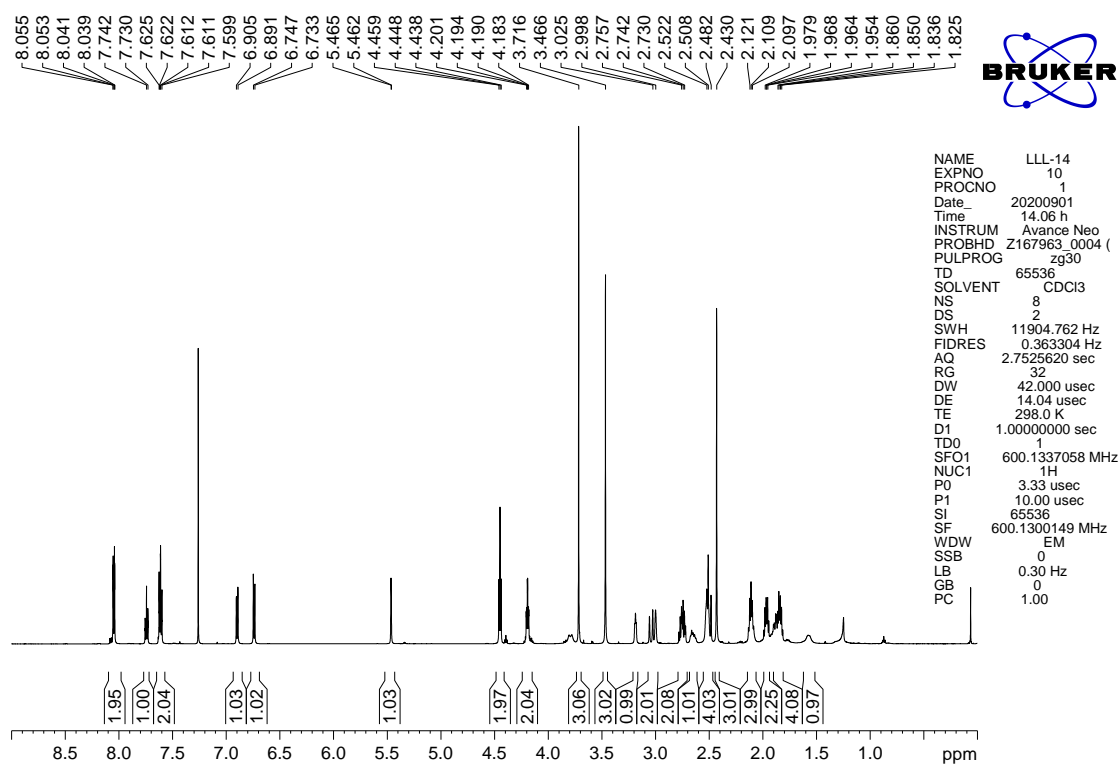

Figure S22. <sup>1</sup>H NMR of compound 7Cb

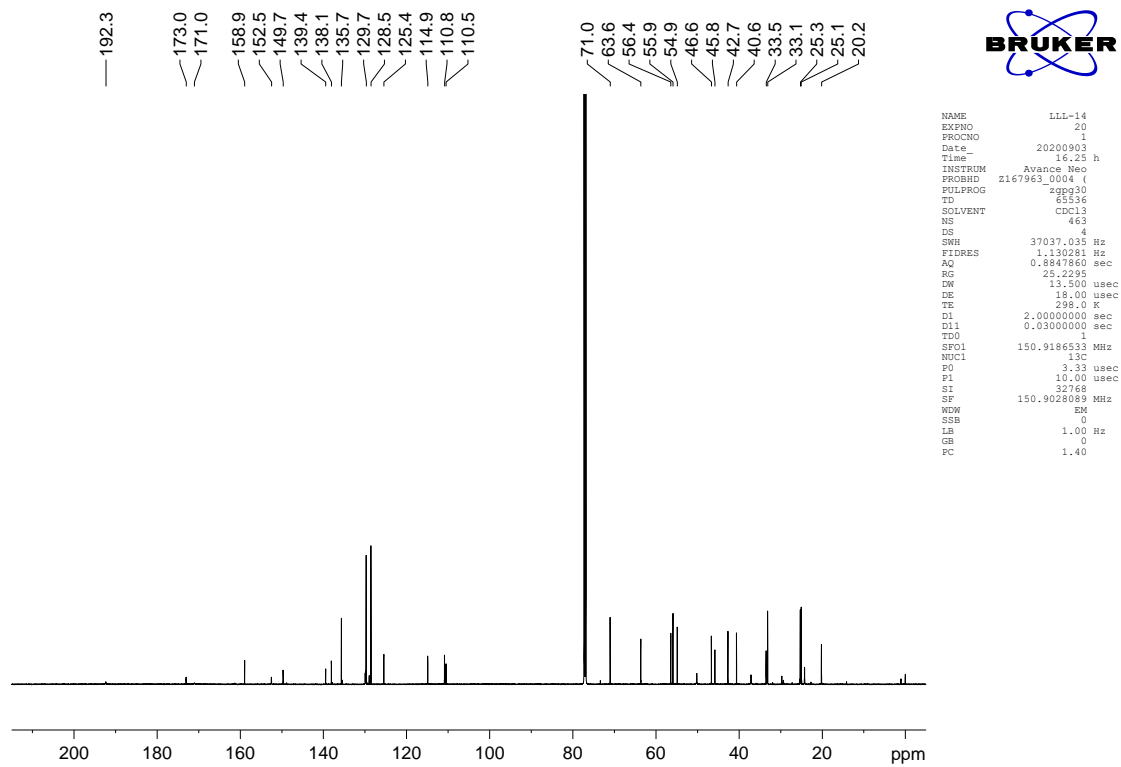

Figure S23.  $^{13}\text{C}$  NMR of compound **7Cb**

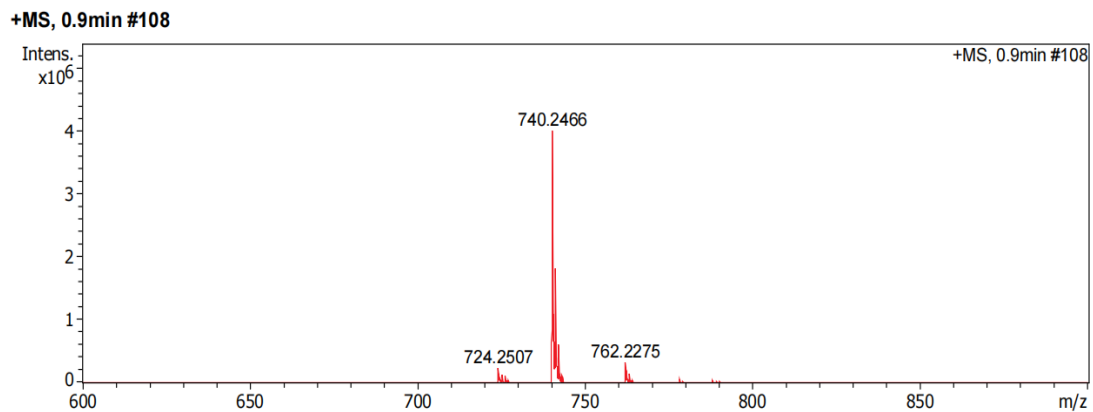

Figure S24. HRESIMS of compound **7Cb**

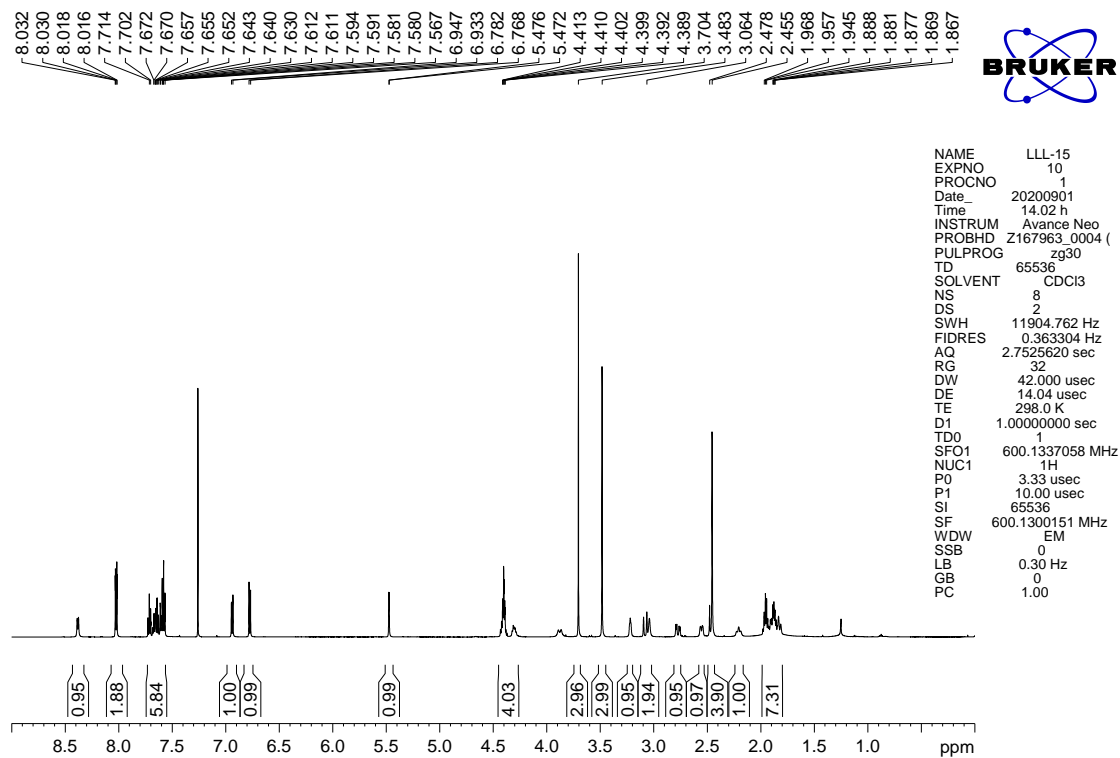

Figure S25. <sup>1</sup>H NMR of compound 7Cc

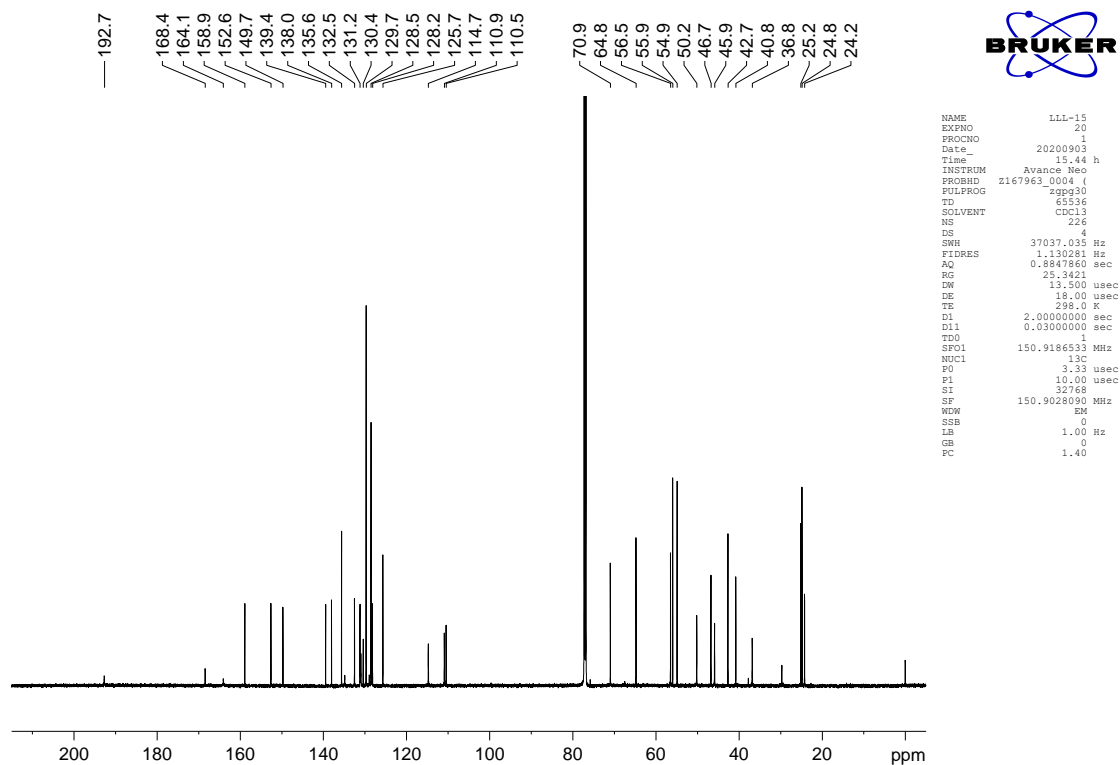

Figure S26. <sup>13</sup>C NMR of compound 7Cc

+MS, 0.9min #102

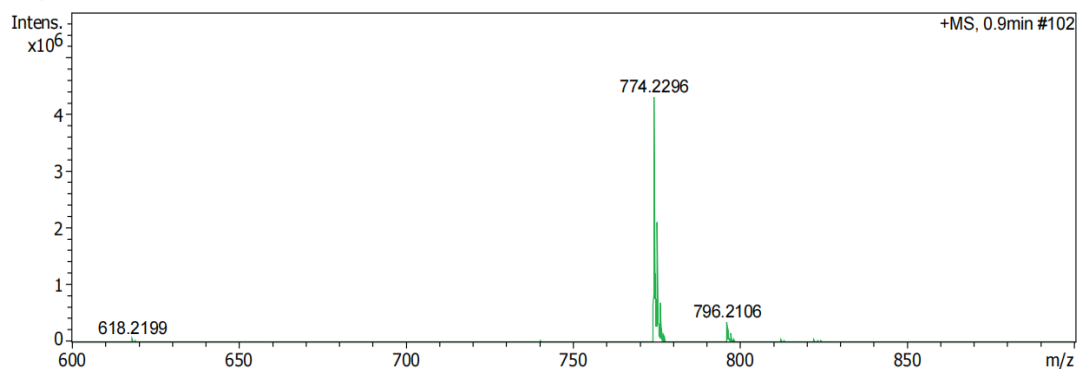

Figure S27. HRESIMS of compound 7Cc

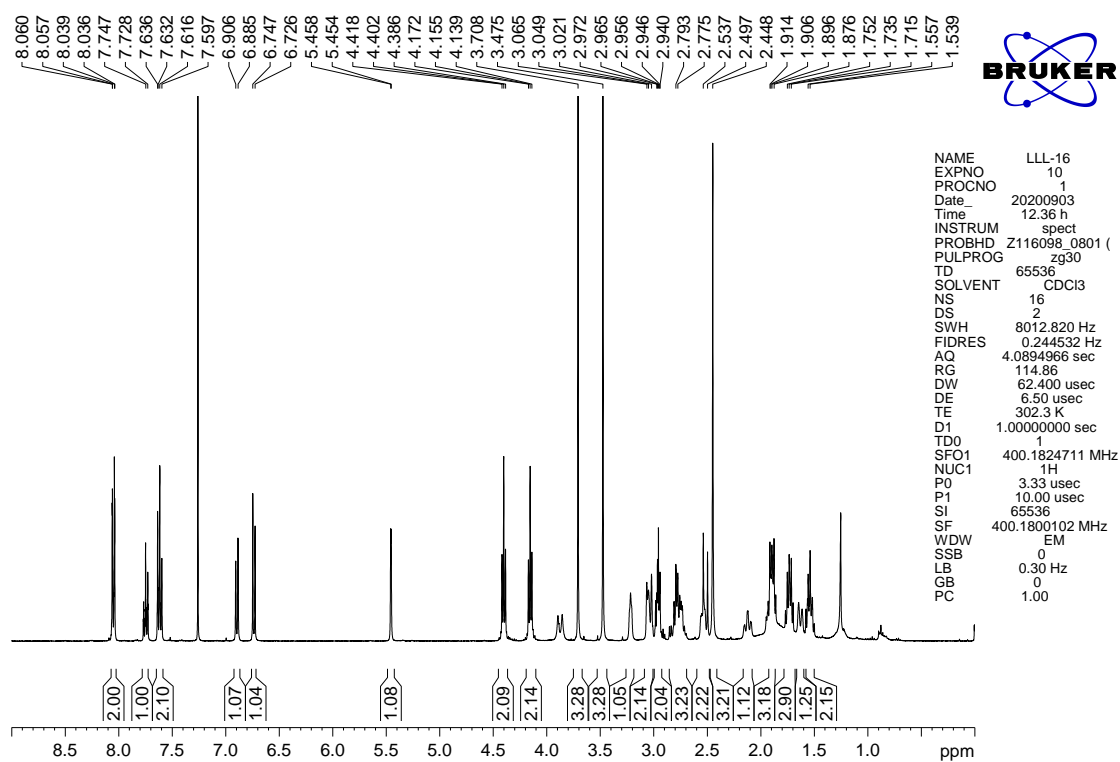

Figure S28. <sup>1</sup>H NMR of compound 7Da

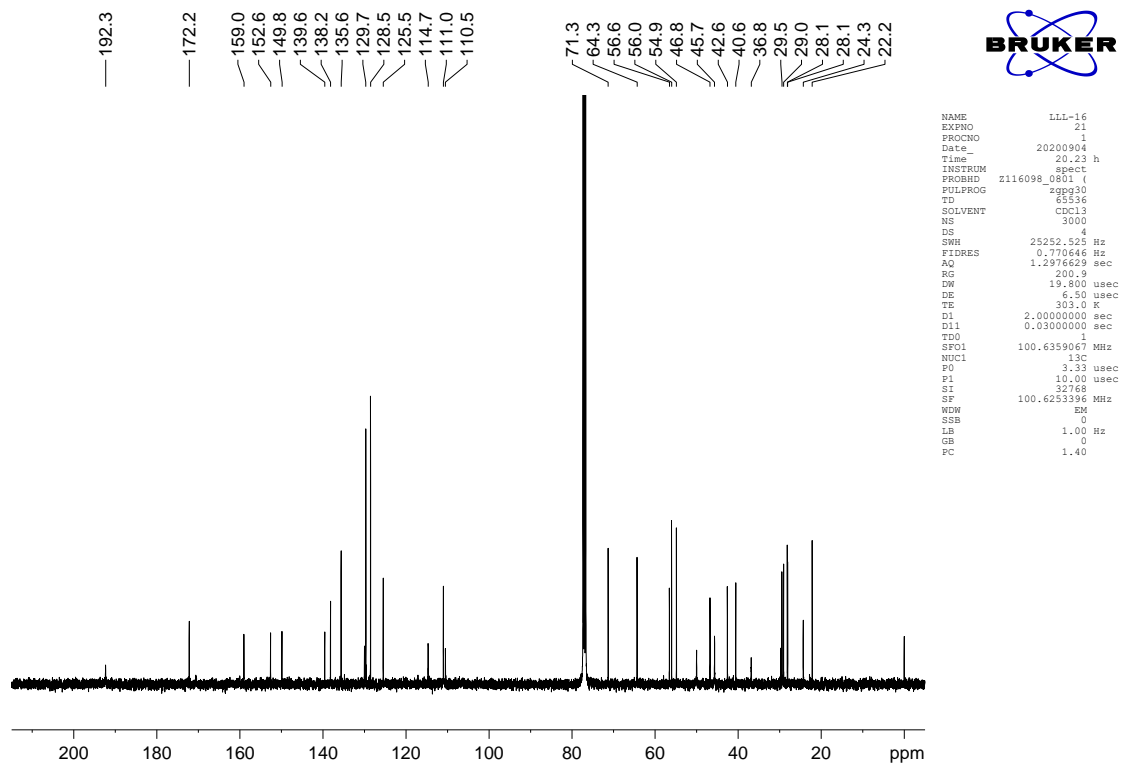

Figure S29. <sup>13</sup>C NMR of compound **7Da**

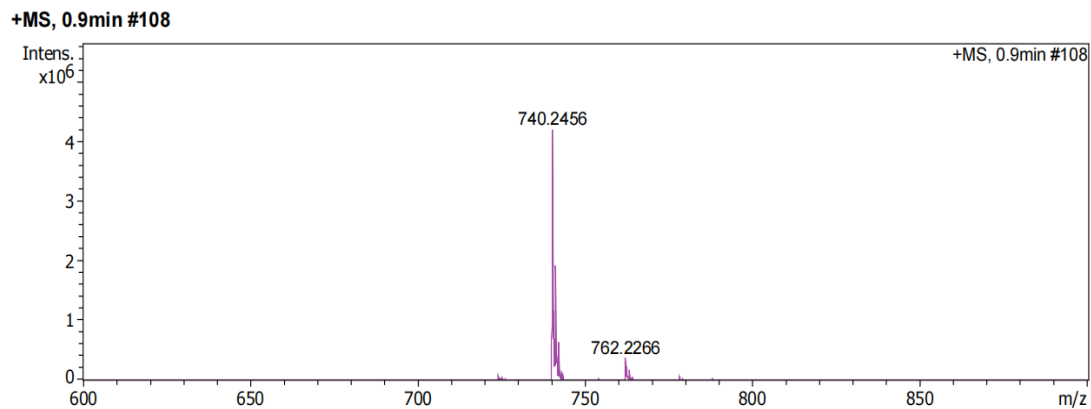

Figure S30. HRESIMS of compound **7Da**



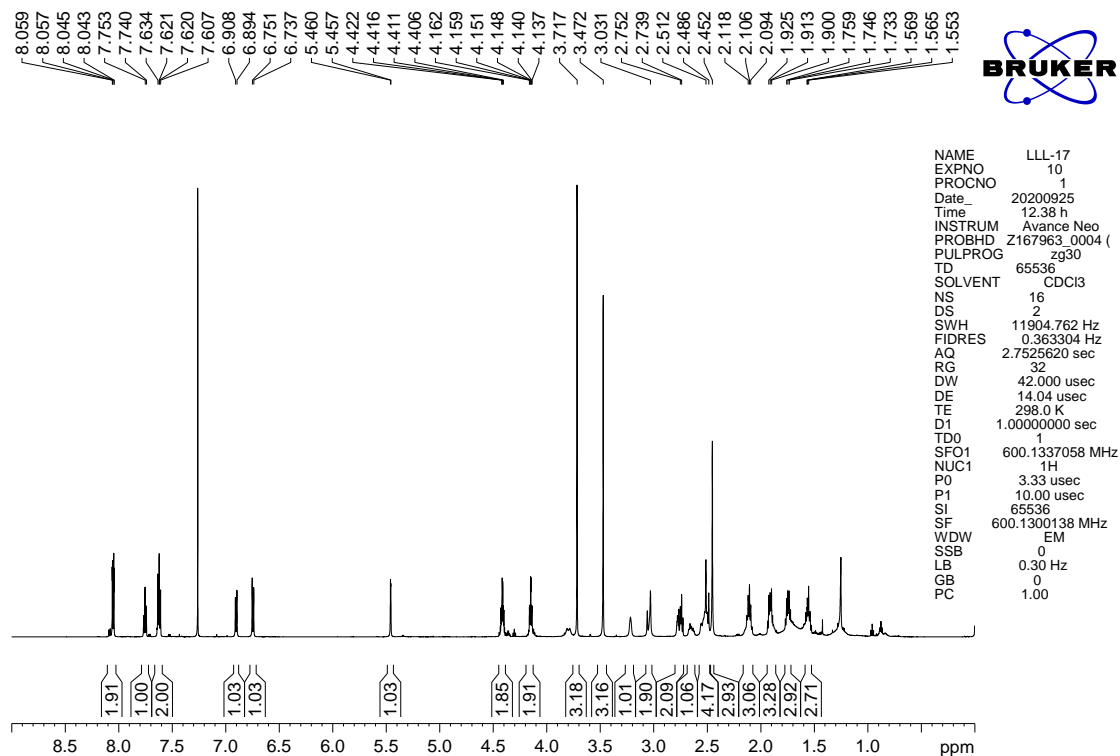

Figure S31. <sup>1</sup>H NMR of compound 7Db

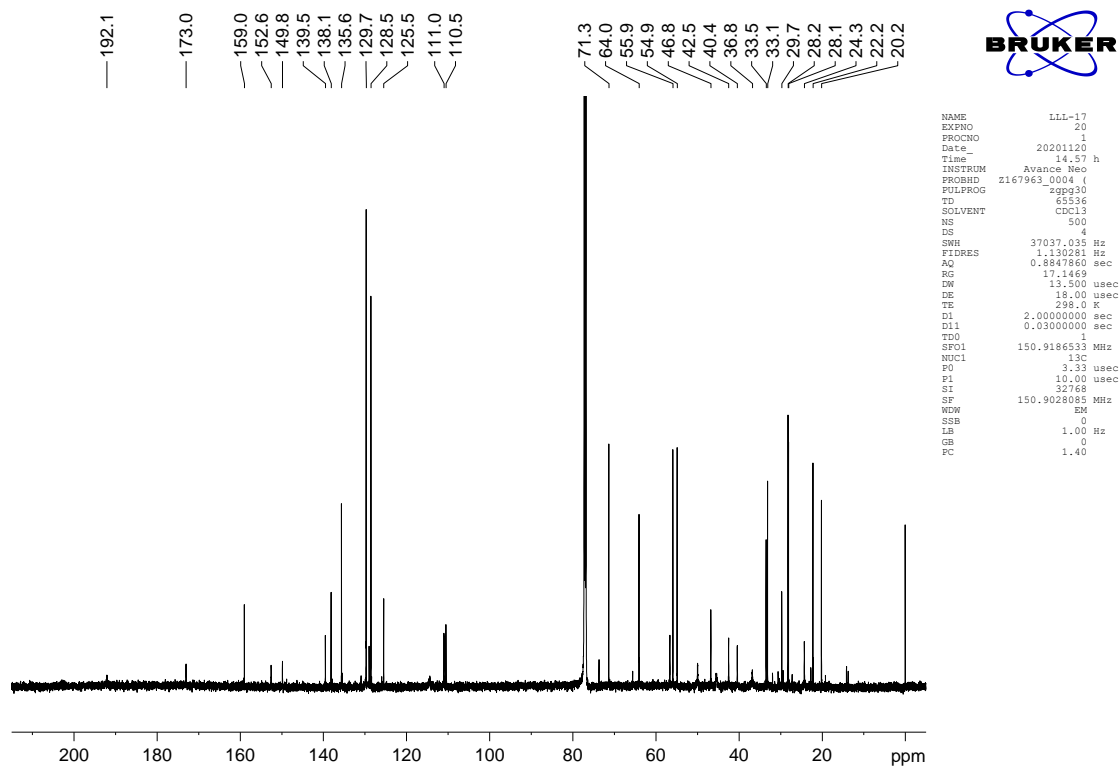

Figure S32. <sup>13</sup>C NMR of compound 7Db

+MS, 0.8min #95

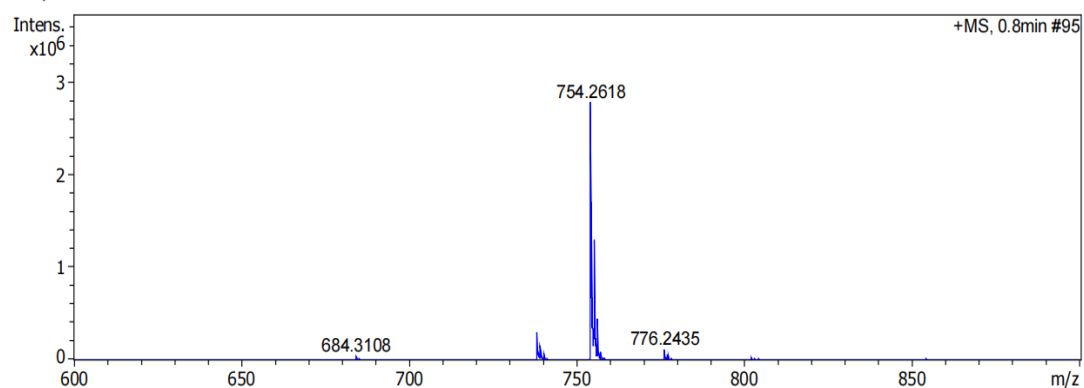

Figure S33. HRESIMS of compound **7Db**

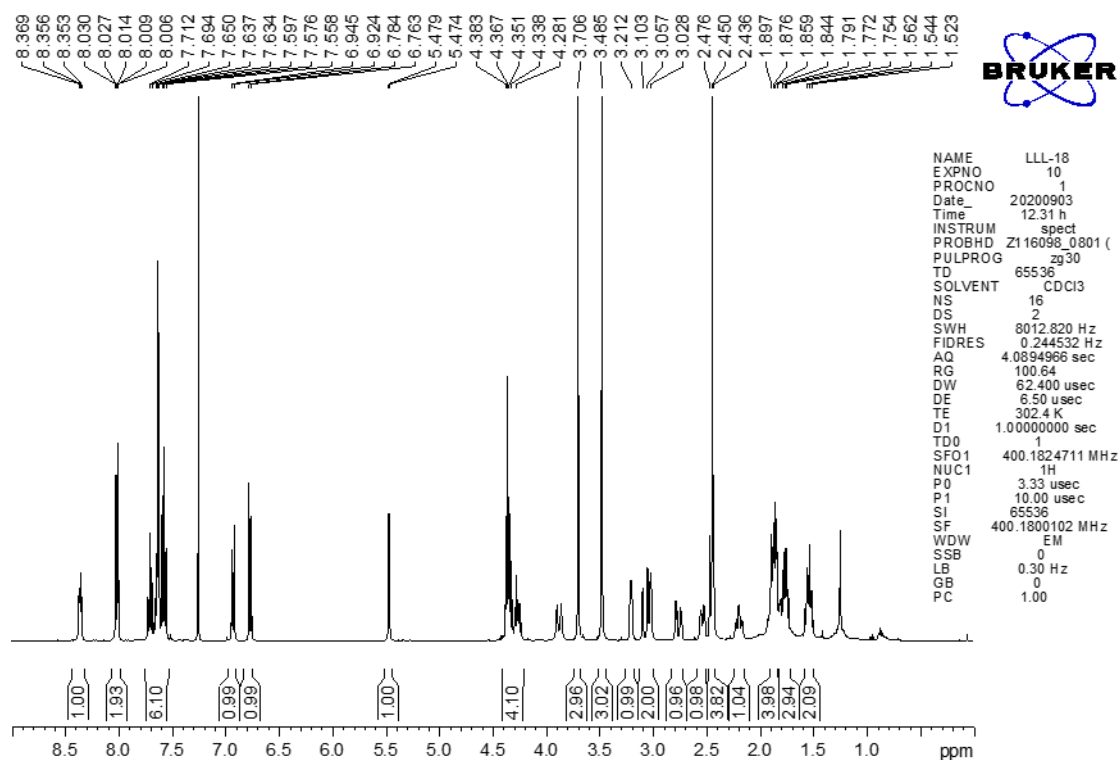

Figure S34. <sup>1</sup>H NMR of compound **7Dc**

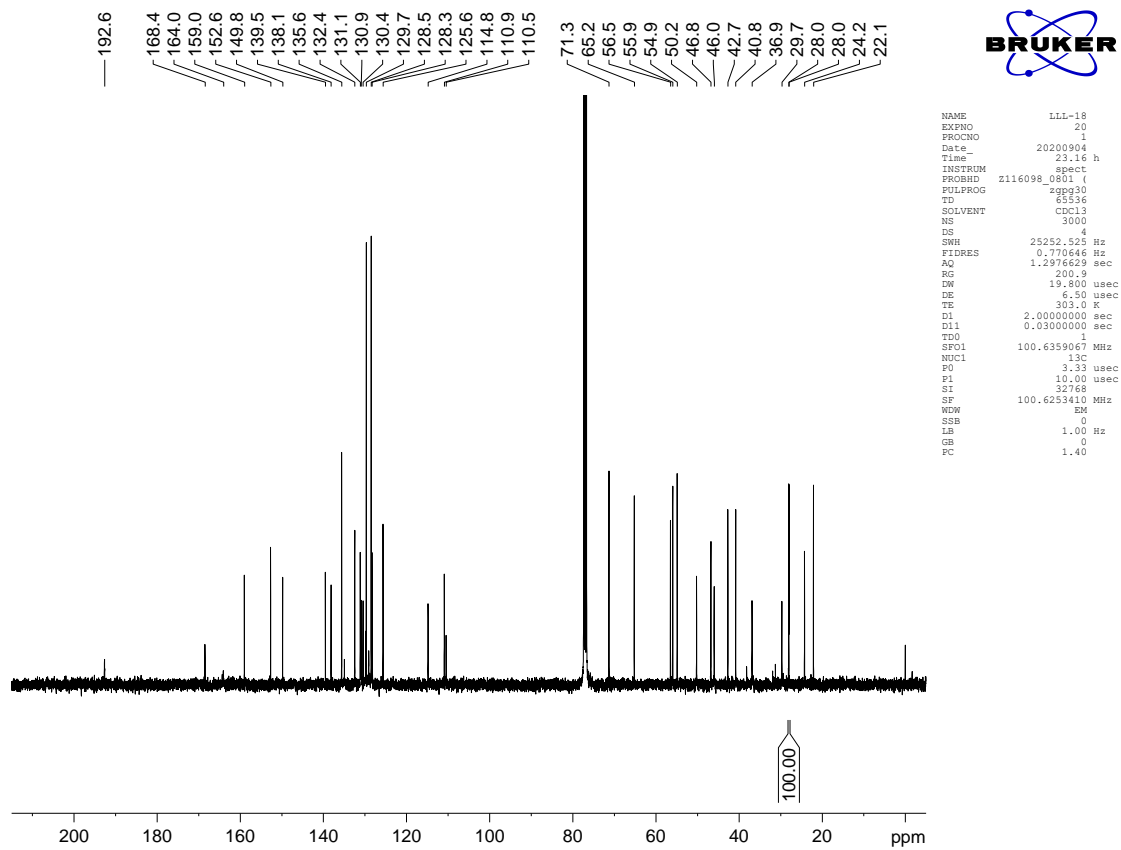

Figure S35. <sup>13</sup>C NMR of compound **7Dc**

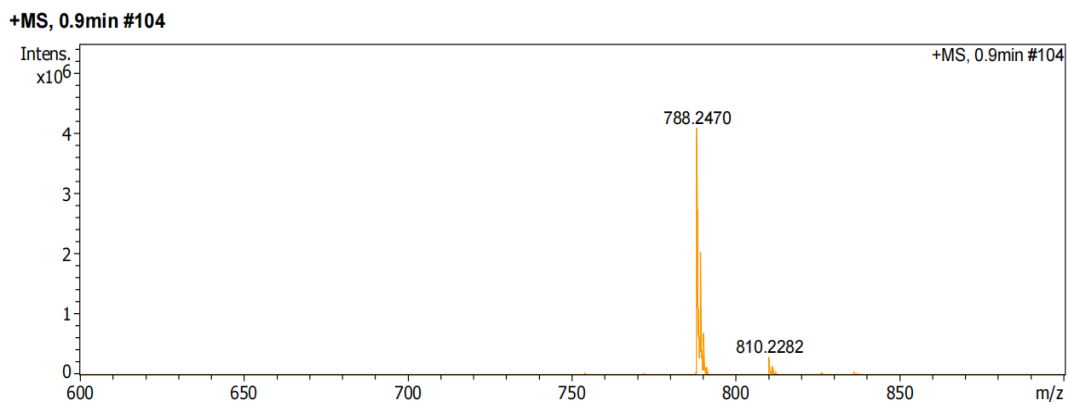

Figure S36. HRESIMS of compound **7Dc**

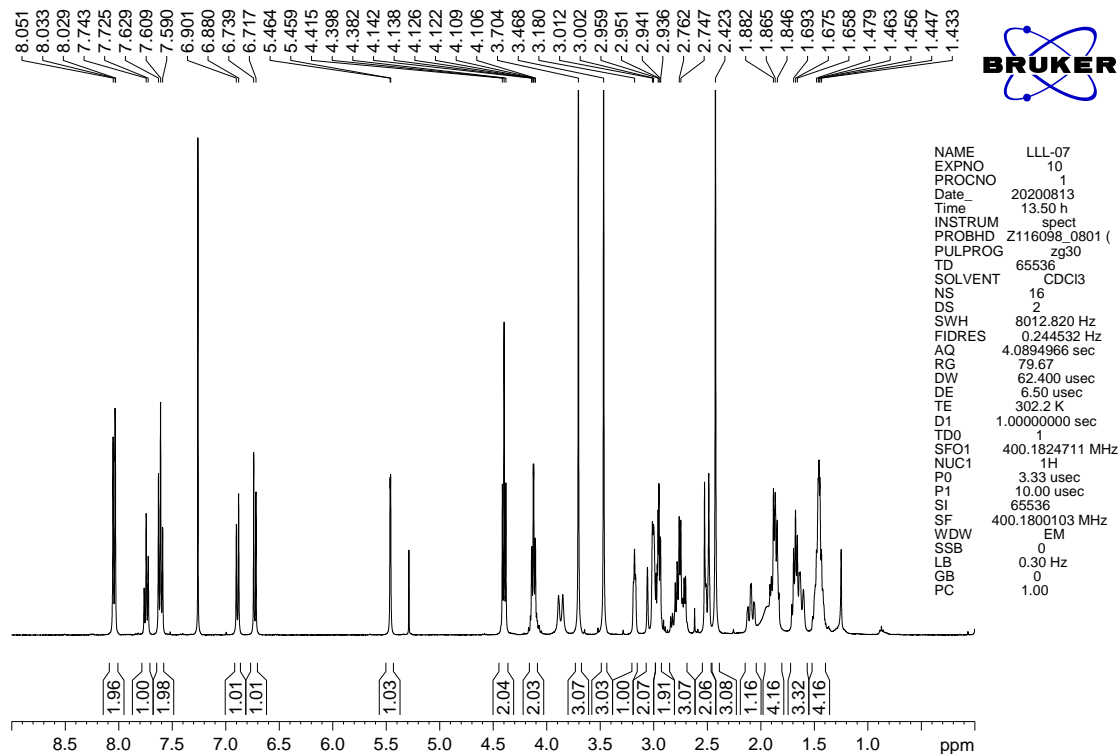

Figure S37. <sup>1</sup>H NMR of compound 7Ea

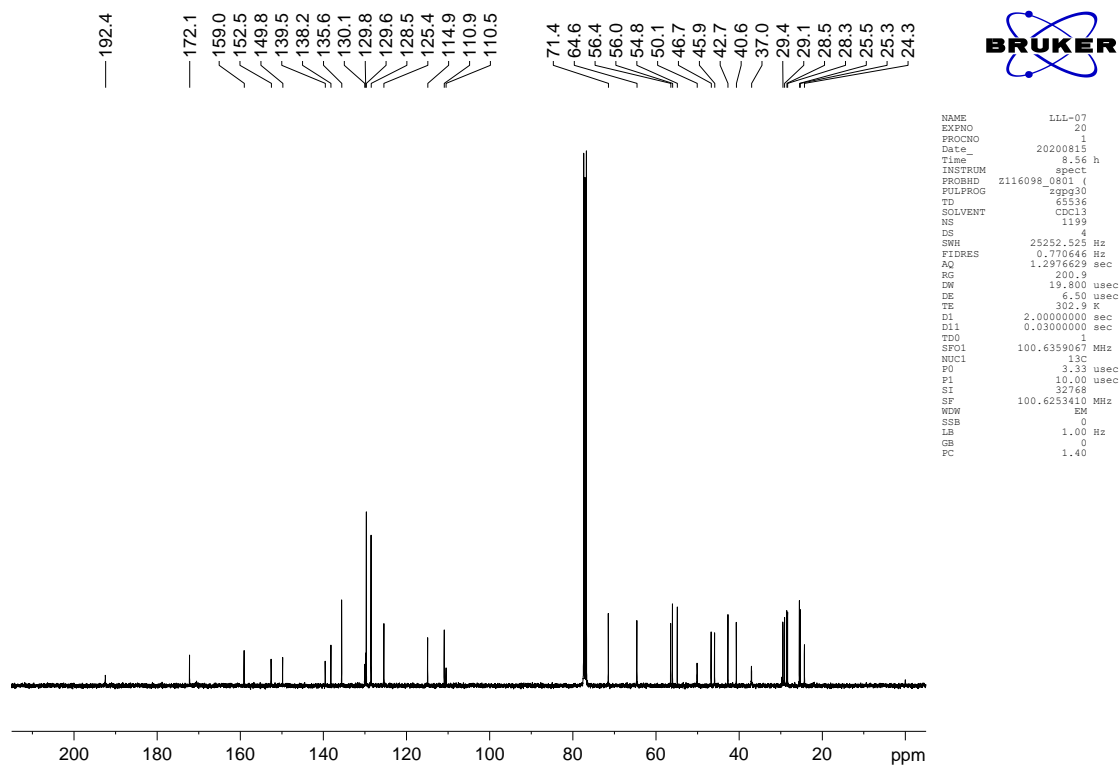

Figure S38. <sup>13</sup>C NMR of compound 7Ea

+MS, 0.9min #101

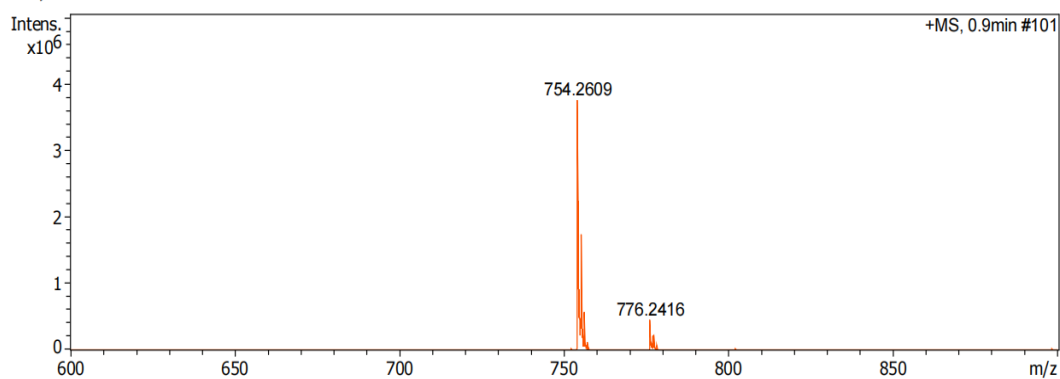

Figure S39. HRESIMS of compound **7Ea**

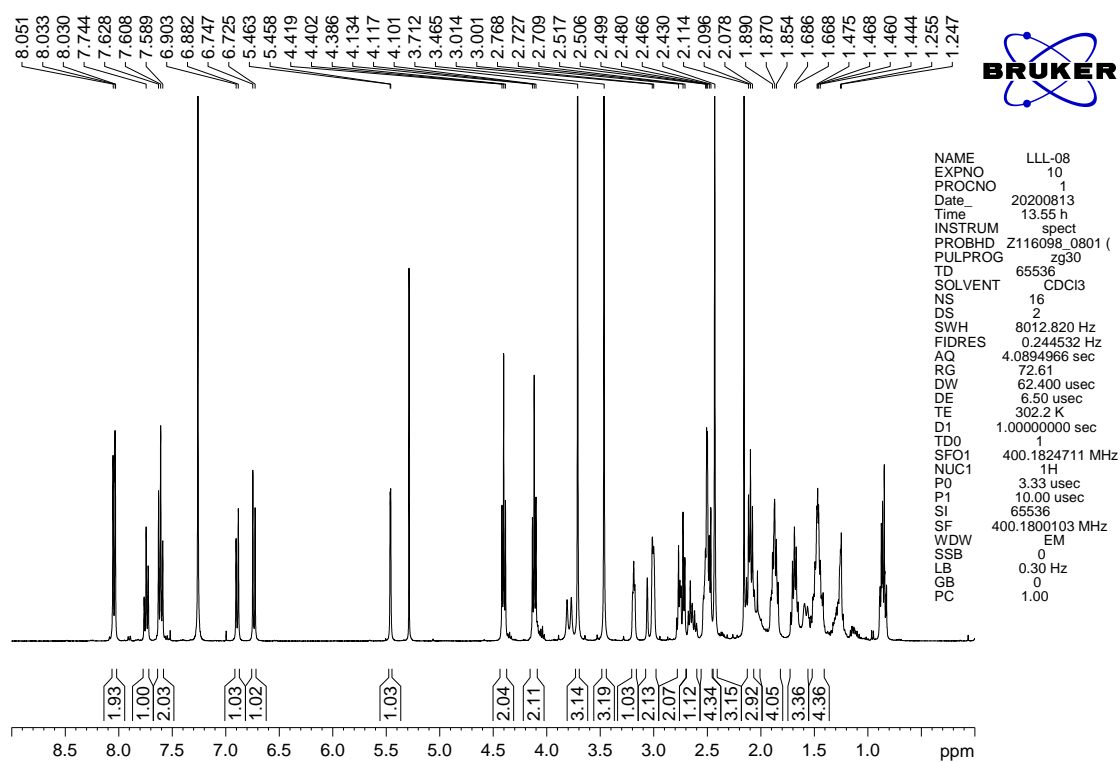

Figure S40. <sup>1</sup>H NMR of compound **7Eb**

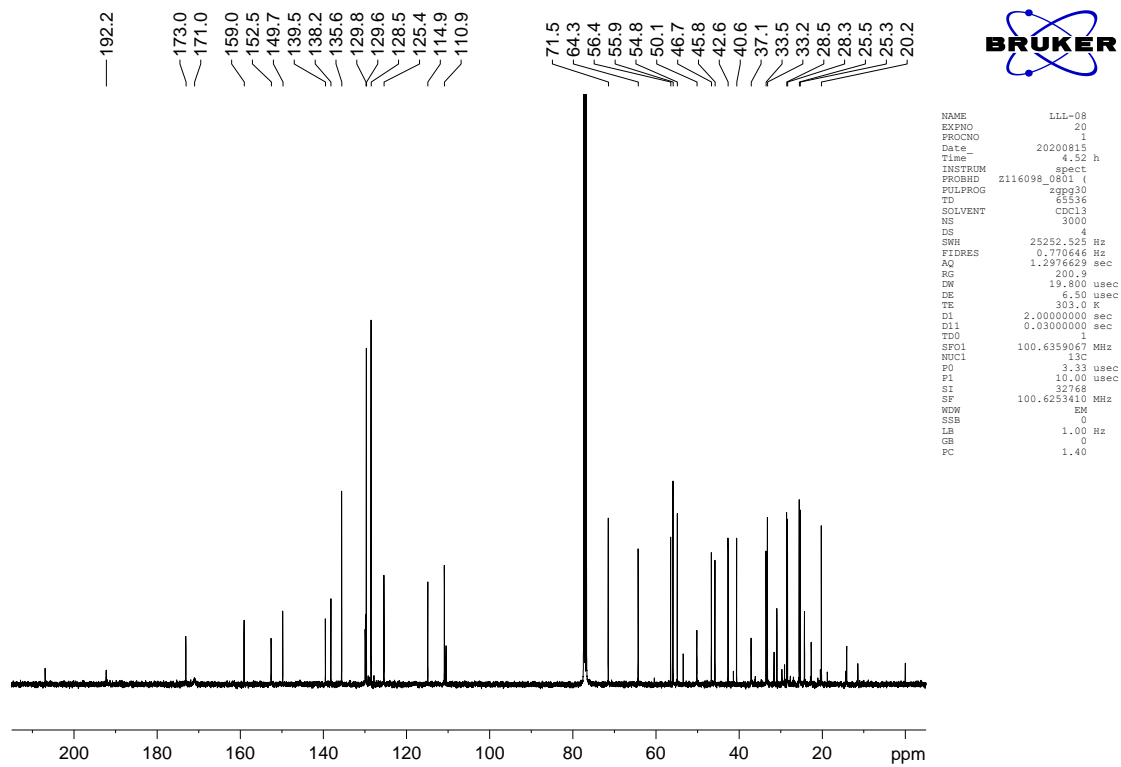

Figure S41.  $^{13}\text{C}$  NMR of compound **7Eb**

+MS, 0.9min #102

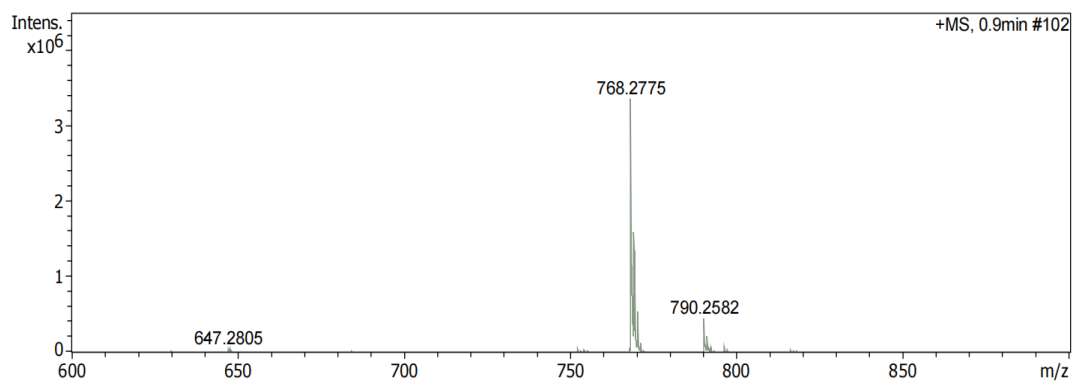

Figure S42. HRESIMS of compound **7Eb**

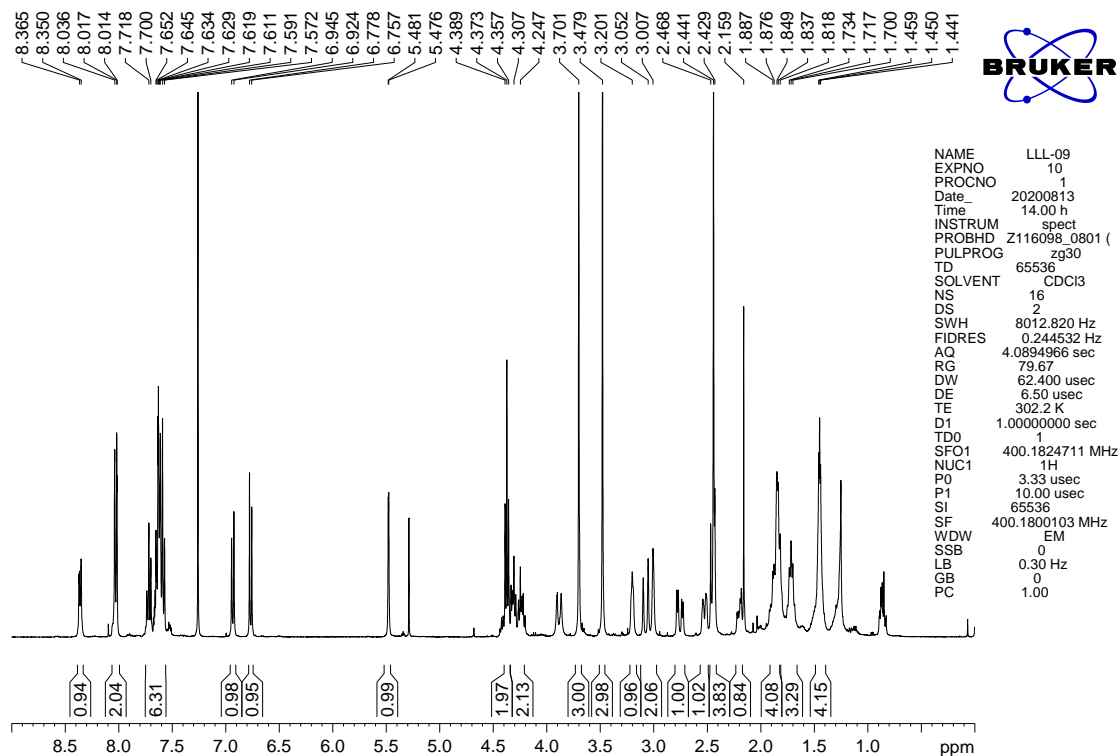

Figure S43.  $^1\text{H}$  NMR of compound **7Ec**

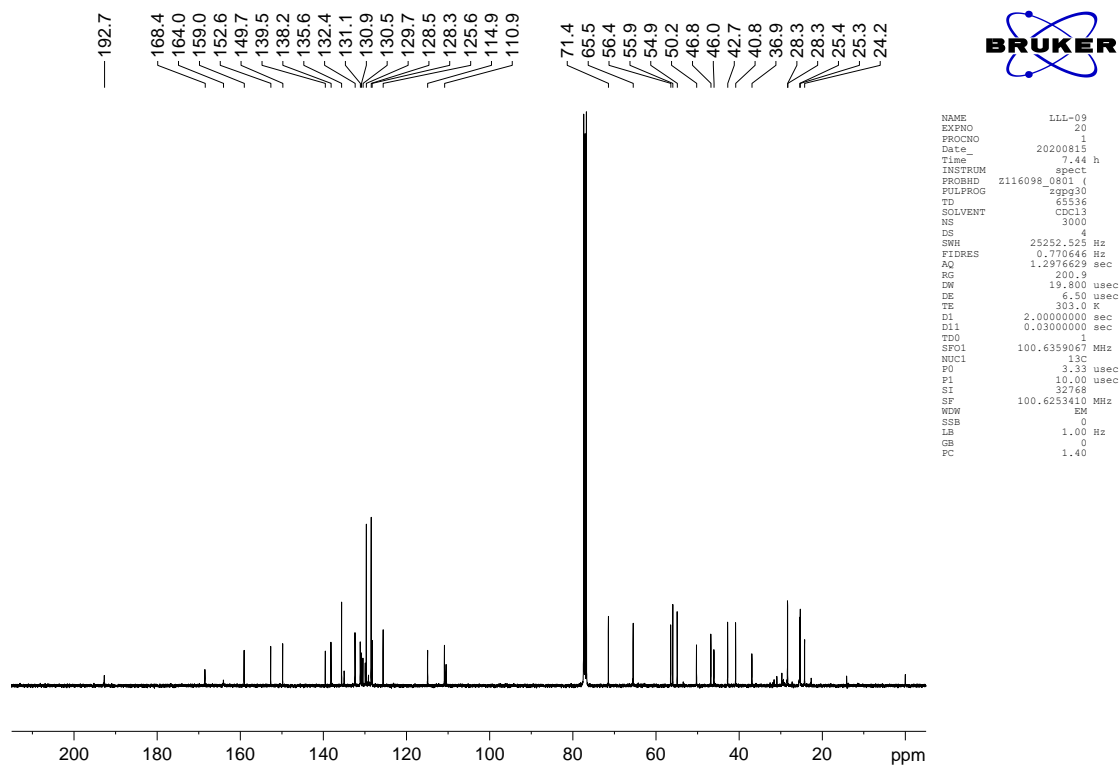

Figure S44.  $^{13}\text{C}$  NMR of compound **7Ec**

+MS, 0.9min #101

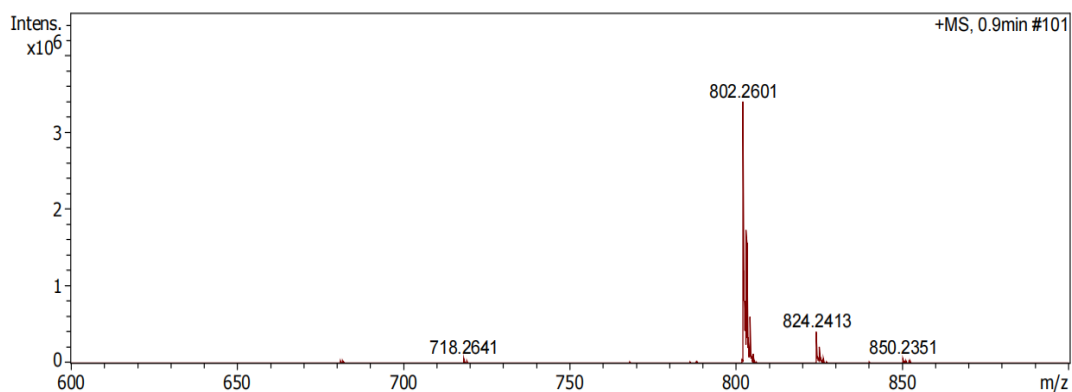

Figure S45. HRESIMS of compound 7Ec

mAU

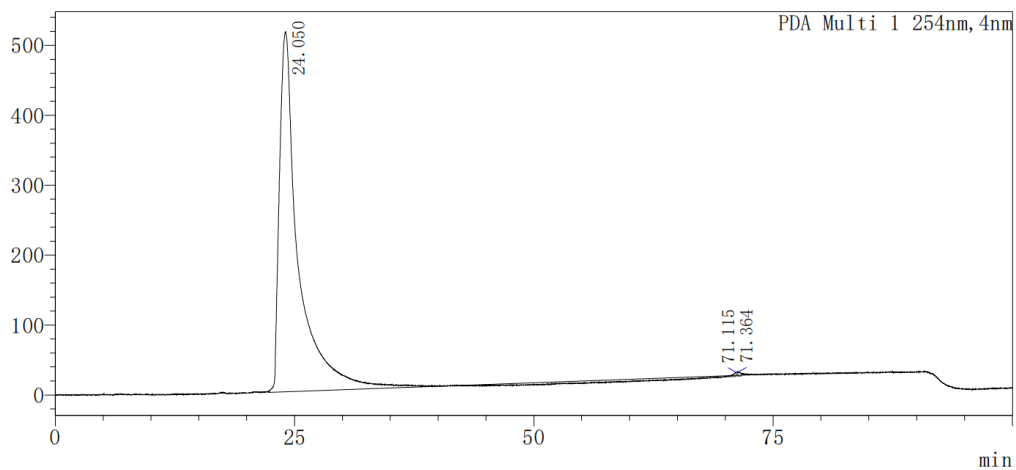

Results of analytical HPLC analysis of compound 7Cc (254nm)

| Peak  | tR     | S        | H      | S%     |
|-------|--------|----------|--------|--------|
| 1     | 24.050 | 65369726 | 514335 | 99.639 |
| 2     | 71.115 | 125767   | 6083   | 0.192  |
| 3     | 71.364 | 111218   | 6065   | 0.170  |
| Total |        | 65606711 | 526483 |        |

The analytical HPLC was a Shimadzu SPD-20A series equipped with an YMC C18 column (150 × 4.6 mm, 5  $\mu$ m, 0.5 ml/min) using 85% aqueous MeOH as mobile phase to test compound 7Cc.

Figure S46. Purity test of Compound 7Cc
